# Supplementary material for: Can nurses remain relevant in a technologically advanced future?
Source: PubMed Central journal article supplement — Int J Nurs Sci. 2018 Oct 4;6(1):106–10. doi: 10.1016/j.ijnss.2018.09.013 (PMC6608671; doi:10.1016/j.ijnss.2018.09.013), 2018-10-04
Supplement: mmc1.pdf [file mmc1.pdf]

# 护士能否在高科技未来继续发挥作用？

Joseph Andrew Pepito,     Rozzano Locsin

## 【摘要】

不断加速出现的技术突破，正在使人类的健康和健康照护发生彻底的变革。技术进步极大地改变了医疗卫生行业的结构和组织。据麦肯锡全球研究院估计，到 2030 年底，全世界有 8 亿人工可以被机器人取代。在医疗保健领域已经发生了机器人革命，使用机器人使医疗工作程序和结果更加有效和安全。Locsin 和 Ito 陈述了护士被类人机器人所取代对护理实践的威胁。常规护理工作有规定的程序和任务指标，使用机器将会完成得更好。在技术高度发展的将来，护理工作的未来发展将不仅仅局限于为达到预期结果实施的护理活动，人类护士如何作为护理的从业人员发挥作用？护士应该参与决定他们职业范围内的哪些方面能够使用技术来改进。护士应该时刻关注自动化技术和人工智能在护理行业的发展，使护理工作更好地在新的体系中延续普遍层面的人文关怀。护理教育和护理研究将围绕专业护理实践的差异化需求发生改变，在实践工作中，机器人只是作为辅助工具而不是主体。

【关键词】人工智能；教育，护理；护理； 机器人学

通信作者：Joseph Andrew Pepito, E-mail: pepitosephandrew@gmail.com
